# Supplementary material
Source: PubMed Central journal article supplement (PMC6785228)
Supplement: ehp3971.smcontents.508.pdf [file ehp3971.smcontents.508.pdf]

**Note to readers with disabilities:** *EHP* strives to ensure that all journal content is accessible to all readers. However, some figures and Supplemental Material published in *EHP* articles may not conform to [508 standards](#) due to the complexity of the information being presented. If you need assistance accessing journal content, please contact [ehp508@niehs.nih.gov](mailto:ehp508@niehs.nih.gov). Our staff will work with you to assess and meet your accessibility needs within 3 working days.

## **Supplemental Material**

### **Influence of the Urban Exposome on Birth Weight**

Mark J. Nieuwenhuijsen, Lydiane Agier, Xavier Basagaña, Jose Urquiza, Ibon Tamayo-Uria, Lise Giorgis-Allemand, Oliver Robinson, Valérie Siroux, Lea Maitre, Montserrat de Castro, Antonia Valentin, David Donaire, Payam Dadvand, Gunn Marit Aasvang, Norun Hjertager Krog, Per E. Schwarze, Leda Chatzi, Regina Grazuleviciene, Sandra Andrusaityte, Audrius Dedele, Rosie McEachan, John Wright, Jane West, Jesús Ibarluzea, Ferran Ballester, Martine Vrijheid, and Rémy Slama

### **Table of Contents**

**Table S1.** Variable removal. An exposure variable was removed if its proportion of missing values was >70%, if its variability was mainly due to between-cities variations (i.e. ratio of city-centered data vs. raw data standard deviation <30%), or if it was correlated at a level >0.99 with another exposure variable.

**Figure S1.** Sensitivity and false discovery proportion (FDP) values obtained by simulation when identifying associations between a set of 57 exposures (generated based on a realistic urban exposome correlation structure) and a continuous health outcome (generated such that it was linearly related to  $p=1, 2, 3, 5, 10$  or  $25$  of these exposures), in a population of 32,000 subjects. For each statistical method that was tested and each scenario (i.e. with  $p=1, 2, 3, 5, 10$  and  $25$  exposures influencing the outcome), the sensitivity and FDP were averaged over 100 simulation runs. DSA, deletion/substitution/addition; ENET, elastic net; EWAS, Environment-wide association study; EWAS-MLR, EWAS-multiple linear regression; FDP, false discovery proportion; sPLS, sparse partial least-squares.
